# Supplementary material for: Multiple Micronutrient Supplementation during Pregnancy and Increased Birth Weight and Skinfold Thicknesses in the Offspring: The Cambridge Baby Growth Study
Source: PubMed Central journal article supplement (PMC7697774; doi:10.3390/nu12113466), 2020-11-12
Supplement: nutrients-12-03466-s001.pdf [file nutrients-12-03466-s001.pdf]

**Supplementary Figure & Tables** for Petry et al. “Multiple Micronutrient Supplementation During Pregnancy and Increased Birth Weight and Skinfold Thicknesses in the Offspring: the Cambridge Baby Growth Study”

**Figure S1** Histograms showing the distributions of (a) when multiple micronutrient supplementation began relative to the start of pregnancy, and (b) the length of time that multiple micronutrient supplementation was taken during (and before) pregnancy.

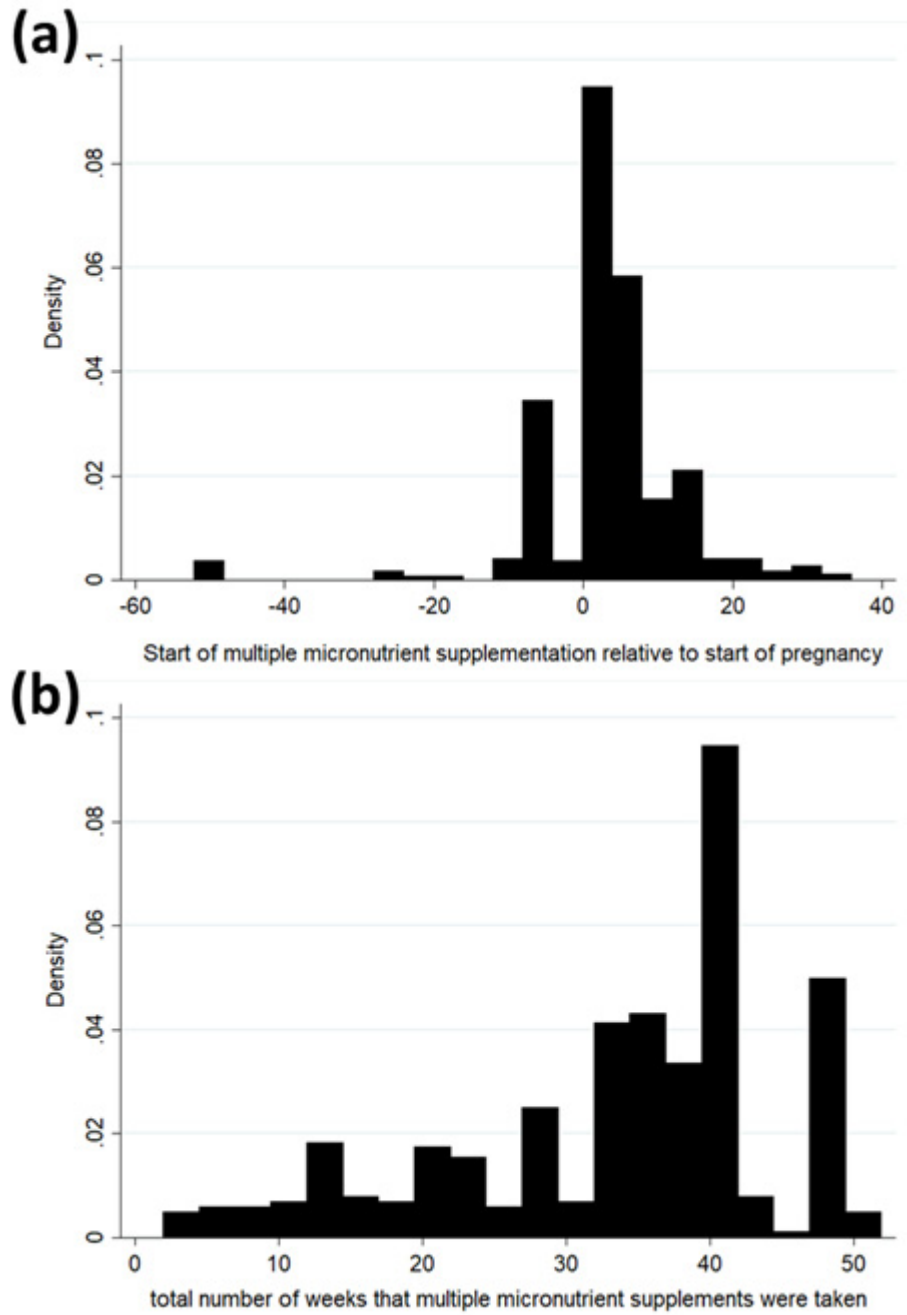

**Table S1** Published nutrient constituents of the most commonly used multiple micronutrient supplements in this population.

| <b>Multiple Micronutrient Preparation</b> | <b>Vitabiotics Pregnancare*</b>    | <b>Sanatogen Pronatal</b> | <b>Tesco Multiplus Pregnancy</b> |
|-------------------------------------------|------------------------------------|---------------------------|----------------------------------|
| Vitamin D                                 | 10 µg<br>(as D3 400 IU)            | 12.5 µg                   | 10 µg                            |
| Vitamin E                                 | 4 mg<br>(α-tocopherol equivalents) | 10 mg<br>(α-tocopherol)   | 12 mg                            |
| Vitamin K                                 | 70 µg                              | N/A                       | 75 µg                            |
| Vitamin C                                 | 70 mg                              | 100 mg                    | 80 mg                            |
| Thiamin (Vitamin B1)                      | 3 mg                               | 1.6 mg                    | 1.1 mg                           |
| Riboflavin (Vitamin B2)                   | 2 mg                               | 1.8 mg                    | 1.4 mg                           |
| Niacin (Vitamin B3)                       | 20 mg<br>(niacin equivalents)      | 19 mg                     | 16 mg                            |
| Vitamin B6                                | 10 mg                              | 2.6 mg                    | 1.4 mg                           |
| Folic Acid                                | 400 µg                             | 400 µg                    | 400 µg                           |
| Vitamin B12                               | 6 µg                               | 2.5 µg                    | 2.5 µg                           |
| Biotin                                    | 150 µg                             | 200 µg                    | 50 µg                            |
| Pantothenic acid                          | 6 mg                               | 8.7 mg                    | 6 mg                             |
| Calcium                                   | N/A                                | 170 mg                    | 120 mg                           |
| Magnesium                                 | 150 mg                             | 100 mg                    | 60 mg                            |
| Iron                                      | 17 mg                              | 14 mg                     | 14 mg                            |
| Zinc                                      | 15 mg                              | 7.5 mg                    | 10 mg                            |
| Copper                                    | 1 mg                               | 1 mg                      | 1 mg                             |
| Selenium                                  | 30 µg                              | N/A                       | 75 µg                            |
| Chromium                                  | N/A                                | N/A                       | 40 µg                            |
| Iodine                                    | 150 µg                             | N/A                       | 150 µg                           |
| Natural mixed carotenoids                 | 2 mg<br>(β-carotene)               | N/A                       | N/A                              |
| Phosphorus                                | N/A                                | 133.3 mg                  | N/A                              |
| Manganese                                 | N/A                                | 1 mg                      | N/A                              |

\*refers to Pregnancare Original supplement preparations.

N/A = not available. IU = International Units.

**Table S2** Comparison of characteristics of those that were included in this present analysis and those that were excluded from it.

| Characteristic                                                     | Included in this analysis         | Excluded from this analysis       | <i>p</i> -value |
|--------------------------------------------------------------------|-----------------------------------|-----------------------------------|-----------------|
| Age (years)                                                        | 33.5<br>(33.2–33.8)<br>(n=885)    | 33.5<br>(33.1–33.9)<br>(n=450)    | 0.9             |
| Maternal pre-pregnancy BMI (kg/m <sup>2</sup> )                    | 24.1<br>(23.8–24.4)<br>(n=859)    | 24.1<br>(23.6–24.6)<br>(n=328)    | 0.9             |
| Weight gain during pregnancy (kg)                                  | 8.466<br>(7.946–8.986)<br>(n=640) | 7.564<br>(6.705–8.424)<br>(n=234) | 0.08            |
| Smoked during pregnancy<br>(n yes/no)                              | 30/921                            | 56/648                            | <0.001          |
| Gestational diabetes<br>(n yes/no)                                 | 66/600                            | 45/373                            | 0.7             |
| Gestational hypertension<br>(n yes/no)                             | 26/442                            | 18/234                            | 0.4             |
| Preeclampsia<br>(n yes/no)                                         | 14/956                            | 8/1,248                           | 0.06            |
| Multifetal pregnancy<br>(n twin pregnancies/singleton pregnancies) | 0/970                             | 21/1,214                          | <0.001          |
| Gestational age at birth of offspring<br>(weeks)*                  | 39.9<br>(39.8–39.9)<br>(n=951)    | 39.7<br>(39.6–39.8)<br>(n=706)    | 0.08            |
| Adjusted offspring birth weight (kg)**                             | 3.476<br>(3.447–3.506)<br>(n=855) | 3.476<br>(3.428–3.525)<br>(n=327) | 1.0             |

Data are numbers of participants or mean (95% confidence interval)

\*adjusted for twin pregnancies

\*\*adjusted for gestational age at birth, parity, sex, maternal BMI and twin pregnancies

**Table S3** Effect of food frequency intakes as confounders in the logistic regression models describing the relationship between multiple micronutrient intake during pregnancy and risk of gestational diabetes in the Cambridge Baby Growth Study.

| <b>Food/Drink type</b>     | <b>n</b> | <b>Relative Risk</b> | <b>p-value</b>       |
|----------------------------|----------|----------------------|----------------------|
| None                       | 666      | 1.86 (1.13–3.08)     | 0.02                 |
| Baked beans                | 660      | 1.89 (1.14–3.11)     | 0.01                 |
| Bean curd                  | 657      | 1.88 (1.13–3.11)     | 0.01                 |
| Beer                       | 636      | 2.00 (1.19–3.37)     | $9.2 \times 10^{-3}$ |
| Canned fish                | 660      | 1.87 (1.13–3.08)     | 0.02                 |
| Canned meat                | 659      | 1.86 (1.13–3.07)     | 0.02                 |
| Canned (non-baked) beans   | 656      | 1.76 (1.06–2.92)     | 0.03                 |
| Chocolate                  | 657      | 1.81 (1.10–3.00)     | 0.02                 |
| Cocoa                      | 636      | 1.98 (1.17–3.34)     | 0.01                 |
| Coffee                     | 652      | 1.92 (1.15–3.20)     | 0.01                 |
| Cola                       | 636      | 2.01 (1.19–3.39)     | $9.1 \times 10^{-3}$ |
| Dried fruit                | 658      | 1.92 (1.16–3.18)     | 0.01                 |
| Eggs                       | 661      | 1.86 (1.12–3.07)     | 0.02                 |
| Fish                       | 658      | 1.87 (1.13–3.08)     | 0.02                 |
| Fresh fruit                | 661      | 1.83 (1.11–3.03)     | 0.02                 |
| Fresh fruit juice          | 656      | 1.86 (1.12–3.07)     | 0.02                 |
| Fresh green vegetables     | 658      | 1.83 (1.11–3.03)     | 0.02                 |
| Fresh non-green vegetables | 659      | 1.86 (1.12–3.07)     | 0.02                 |
| Frozen vegetables          | 659      | 1.86 (1.13–3.08)     | 0.02                 |
| Hard cheese                | 661      | 1.86 (1.12–3.07)     | 0.02                 |
| Liver                      | 660      | 1.84 (1.11–3.04)     | 0.02                 |
| Meat                       | 660      | 1.86 (1.12–3.07)     | 0.02                 |
| Organic food               | 657      | 1.86 (1.12–3.08)     | 0.02                 |
| Poultry                    | 659      | 1.85 (1.12–3.06)     | 0.02                 |
| Pulses                     | 659      | 1.78 (1.07–2.97)     | 0.03                 |
| Salad                      | 651      | 1.82 (1.10–3.01)     | 0.02                 |
| Shellfish                  | 653      | 1.81 (1.09–2.99)     | 0.02                 |
| Soft cheese                | 645      | 1.84 (1.11–3.05)     | 0.02                 |
| Soya                       | 658      | 1.81 (1.09–2.99)     | 0.02                 |
| Spirits                    | 636      | 1.83 (1.09–3.06)     | 0.02                 |
| Tea                        | 649      | 1.96 (1.16–3.31)     | 0.01                 |
| Tinned fruit               | 658      | 1.85 (1.12–3.06)     | 0.02                 |
| Tinned vegetables          | 661      | 1.89 (1.15–3.13)     | 0.01                 |
| White fish                 | 657      | 1.83 (1.10–3.02)     | 0.02                 |
| Wine                       | 643      | 1.93 (1.14–3.25)     | 0.01                 |
| Yogurt                     | 658      | 1.81 (1.09–2.99)     | 0.02                 |

Data are either individual numbers or means (95% confidence intervals).
